# Supplementary material for: Picolylamine–Ni(ii) complex attached on 1,3,5-triazine-immobilized silica-coated Fe3O4core/shell magnetic nanoparticles as an environmentally friendly and recyclable catalyst for the one-pot synthesis of substituted pyridine derivatives
Source: Royal Society of Chemistry journal article supplement (doi:10.1039/d3ra01826a), 2023-01-01
Supplement: d3ra01826a1.pdf [file d3ra01826a1.pdf]

## Supplementary data

### **Picolylamine-Ni(II) Complex Attached on 1,3,5-Triazine-Immobilized Silica-Coated Fe<sub>3</sub>O<sub>4</sub> Core/Shell Magnetic Nanoparticles as an Environmental Friendliness and Recyclable Catalyst for One-Pot Synthesis of Substituted Pyridine Derivatives**

Sobhan Rezayati<sup>a</sup>, Fatemeh Kalantari<sup>a</sup>, Ali Ramazani<sup>\*a,b</sup>

<sup>a</sup>*Department of Chemistry, Faculty of Science, University of Zanjan, Zanjan 45371-38791, Iran*

<sup>b</sup>*Department of Biotechnology, Research Institute of Modern Biological Techniques (RIMBT), University of Zanjan, Zanjan 45371-38791, Iran*

Corresponding author : [aliramazani@znu.ac.ir](mailto:aliramazani@znu.ac.ir); [aliramazani@gmail.com](mailto:aliramazani@gmail.com)

| <b>List of Contents</b>                                                                                                                   | <b>Page</b> |
|-------------------------------------------------------------------------------------------------------------------------------------------|-------------|
| <b>Table S1.</b> The XRD data for the Ni <sup>II</sup> -Picolylamine/TCT/APTES@SiO <sub>2</sub> @Fe <sub>3</sub> O <sub>4</sub>           | S4          |
| <b>Figure S1.</b> FT-IR spectrum of 2-amino-4-phenyl-6-(phenylthio)pyridine-3,5-dicarbonitrile ( <b>4a</b> )                              | S7          |
| <b>Figure S2.</b> <sup>1</sup> H NMR spectrum of 2-amino-4-phenyl-6-(phenylthio)pyridine-3,5-dicarbonitrile ( <b>4a</b> )                 | S8          |
| <b>Figure S3.</b> <sup>13</sup> C NMR spectrum of 2-amino-4-phenyl-6-(phenylthio)pyridine-3,5-dicarbonitrile ( <b>4a</b> )                | S9          |
| <b>Figure S4.</b> FT-IR spectrum of 2-amino-4-(4-nitrophenyl)-6-(phenylthio)pyridine-3,5-dicarbonitrile ( <b>4b</b> )                     | S10         |
| <b>Figure S5.</b> <sup>1</sup> H NMR spectrum of 2-amino-4-(4-nitrophenyl)-6-(phenylthio)pyridine-3,5-dicarbonitrile ( <b>4b</b> )        | S11         |
| <b>Figure S6.</b> <sup>13</sup> C NMR spectrum of 2-amino-4-(4-nitrophenyl)-6-(phenylthio)pyridine-3,5-dicarbonitrile ( <b>4b</b> )       | S12         |
| <b>Figure S7.</b> FT-IR spectrum of 2-amino-4-(4-chlorophenyl)-6-(phenylthio)pyridine-3,5-dicarbonitrile ( <b>4c</b> )                    | S13         |
| <b>Figure S8.</b> <sup>1</sup> H NMR spectrum of 2-amino-4-(4-chlorophenyl)-6-(phenylthio)pyridine-3,5-dicarbonitrile ( <b>4c</b> )       | S14         |
| <b>Figure S9.</b> <sup>13</sup> C NMR spectrum of 2-amino-4-(4-chlorophenyl)-6-(phenylthio)pyridine-3,5-dicarbonitrile ( <b>4c</b> )      | S15         |
| <b>Figure S10.</b> FT-IR spectrum of 2-amino-4-(4-cyanophenyl)-6-(phenylthio)pyridine-3,5-dicarbonitrile ( <b>4d</b> )                    | S16         |
| <b>Figure S11.</b> <sup>1</sup> H NMR spectrum of 2-amino-4-(4-cyanophenyl)-6-(phenylthio)pyridine-3,5-dicarbonitrile ( <b>4d</b> )       | S17         |
| <b>Figure S12.</b> <sup>13</sup> C NMR spectrum of 2-amino-4-(4-cyanophenyl)-6-(phenylthio)pyridine-3,5-dicarbonitrile ( <b>4d</b> )      | S18         |
| <b>Figure S13.</b> FT-IR spectrum of 2-amino-4-(4-methylphenyl)-6-(phenylthio)pyridine-3,5-dicarbonitrile ( <b>4e</b> )                   | S19         |
| <b>Figure S14.</b> <sup>1</sup> H NMR spectrum of 2-amino-4-(4-methylphenyl)-6-(phenylthio)pyridine-3,5-dicarbonitrile ( <b>4e</b> )      | S20         |
| <b>Figure S15.</b> <sup>13</sup> C NMR spectrum of 2-amino-4-(4-methylphenyl)-6-(phenylthio)pyridine-3,5-dicarbonitrile ( <b>4e</b> )     | S21         |
| <b>Figure S16.</b> FT-IR spectrum of 2-amino-4-(4-fluorophenyl)-6-(phenylthio)pyridine-3,5-dicarbonitrile ( <b>4f</b> )                   | S22         |
| <b>Figure S17.</b> <sup>1</sup> H NMR spectrum of 2-amino-4-(4-fluorophenyl)-6-(phenylthio)pyridine-3,5-dicarbonitrile ( <b>4f</b> )      | S23         |
| <b>Figure S18.</b> <sup>13</sup> C NMR spectrum of 2-amino-4-(4-fluorophenyl)-6-(phenylthio)pyridine-3,5-dicarbonitrile ( <b>4f</b> )     | S24         |
| <b>Figure S19.</b> FT-IR spectrum of 2-amino-4-(2,6-dichlorophenyl)-6-(phenylthio)pyridine-3,5-dicarbonitrile ( <b>4j</b> )               | S25         |
| <b>Figure S20.</b> <sup>1</sup> H NMR spectrum of 2-amino-4-(2,6-dichlorophenyl)-6-(phenylthio)pyridine-3,5-dicarbonitrile ( <b>4j</b> )  | S26         |
| <b>Figure S21.</b> <sup>13</sup> C NMR spectrum of 2-amino-4-(2,6-dichlorophenyl)-6-(phenylthio)pyridine-3,5-dicarbonitrile ( <b>4j</b> ) | S27         |

|                                                                                                                                      |     |
|--------------------------------------------------------------------------------------------------------------------------------------|-----|
| <b>Figure S22.</b> FT-IR spectrum of 2-amino-4-(2-nitrophenyl)-6-(phenylthio)pyridine-3,5-dicarbonitrile ( <b>4I</b> )               | S28 |
| <b>Figure S23.</b> <sup>1</sup> H NMR spectrum of 2-amino-4-(2-nitrophenyl)-6-(phenylthio)pyridine-3,5-dicarbonitrile ( <b>4I</b> )  | S29 |
| <b>Figure S24.</b> <sup>13</sup> C NMR spectrum of 2-amino-4-(2-nitrophenyl)-6-(phenylthio)pyridine-3,5-dicarbonitrile ( <b>4I</b> ) | S30 |

**Table S1.** The XRD data for the Ni<sup>II</sup>-Picolyamine/TCT/APTES@SiO<sub>2</sub>@Fe<sub>3</sub>O<sub>4</sub>

| Entry | 2θ    | Peak width<br>(FWHM) | Miller indices |   |   | Particle<br>size | Inter-planer<br>distance |
|-------|-------|----------------------|----------------|---|---|------------------|--------------------------|
|       |       |                      | h              | k | l |                  |                          |
| 1     | 30.45 | 0.3444               | 1              | 0 | 4 | 23.9             | 0.270                    |
| 2     | 35.44 | 0.2460               | 1              | 1 | 0 | 33.9             | 0.251                    |
| 3     | 35.68 | 0.2460               | 1              | 1 | 0 | 33.9             | 0.251                    |
| 4     | 43.24 | 0.2952               | 2              | 0 | 2 | 29.0             | 0.207                    |
| 5     | 53.69 | 0.5904               | 1              | 1 | 6 | 15.1             | 0.169                    |
| 6     | 57.14 | 0.2640               | 1              | 2 | 2 | 33.9             | 0.160                    |
| 7     | 62.86 | 0.2952               | 2              | 1 | 4 | 31.6             | 0.148                    |

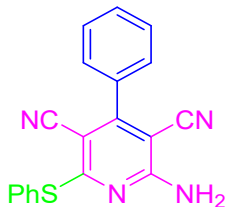

**2-Amino-4-phenyl-6-(phenylthio)pyridine-3,5-dicarbonitrile (4a)**

Pale yellow solid, FT-IR (KBr):  $\nu$  3554, 3478, 3062, 2970, 2217, 1651, 1625, 1441, 1263, 1037, 757  $\text{cm}^{-1}$ .  $^1\text{H-NMR}$  (250 MHz,  $\text{CDCl}_3$ ):  $\delta$  7.22-7.54 (m, 10H, Ar-H), 5.48 (s, 2H,  $\text{NH}_2$ ).  $^{13}\text{C-NMR}$  (62.5 MHz,  $\text{CDCl}_3$ ):  $\delta$  87.4, 114.7, 115.2, 127.1, 128.4, 129.0, 129.3, 129.9, 130.9, 133.1, 135.7, 158.3, 159.2, 169.0.

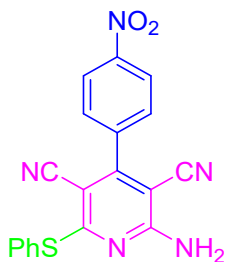

**2-Amino-4-(4-nitrophenyl)-6-(phenylthio)pyridine-3,5-dicarbonitrile (4b)**

Yellow solid, IR (KBr):  $\nu$  3424, 3333, 2213, 1638, 1459, 1317, 1262, 1022, 848, 745  $\text{cm}^{-1}$ .  $^1\text{H-NMR}$  (250 MHz,  $\text{DMSO-}d_6$ ):  $\delta$  8.39 (d, 2H,  $J = 8.25$  Hz, Ar-H), 7.83-7.90 (m, 5H, Ar-H), 7.48-7.57 (m, 4H, Ar-H,  $\text{NH}_2$ ).  $^{13}\text{C-NMR}$  (62.5 MHz,  $\text{DMSO-}d_6$ ):  $\delta$  87.4, 93.5, 115.0, 115.4, 124.3, 127.3, 129.9, 130.2, 131.7, 135.2, 140.6, 157.1, 159.9, 166.6.

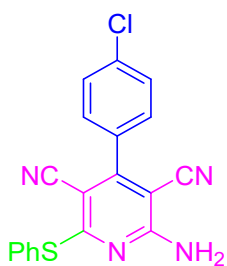

**2-Amino-4-(4-chlorophenyl)-6-(phenylthio)pyridine-3,5-dicarbonitrile (4c)**

Green solid, IR (KBr):  $\nu$  3486, 3415, 2213, 1633, 1494, 1259, 1093, 805, 741  $\text{cm}^{-1}$ .  $^1\text{H-NMR}$  (250 MHz,  $\text{CDCl}_3$ ):  $\delta$  7.25-7.52 (m, 9H, Ar-H), 5.47 (s, 2H,  $\text{NH}_2$ ).  $^{13}\text{C-NMR}$  (62.5 MHz,  $\text{CDCl}_3$ ):  $\delta$  87.1, 95.7, 114.9, 129.3, 129.4, 129.8, 130.0, 131.4, 135.7, 137.4, 142.1, 157.1, 159.1, 169.3

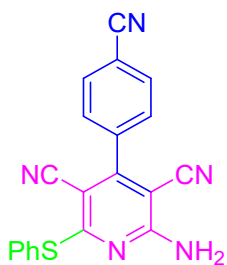

**2-Amino-4-(4-cyanophenyl)-6-(phenylthio)pyridine-3,5-dicarbonitrile (4d)**

Pale yellow solid, IR (KBr):  $\nu$  3415, 3318, 2234, 2217, 1636, 1464, 1263, 1022, 749  $\text{cm}^{-1}$ .  $^1\text{H-NMR}$  (250 MHz,  $\text{DMSO-}d_6$ ):  $\delta$  8.05 (d, 2H,  $J = 7.5$ , Ar-H), 7.89 (s, 2H,  $\text{NH}_2$ ), 7.76 (d, 2H,  $J = 7.5$ , Ar-H), 7.48-7.56 (m, 5H, Ar-H).  $^{13}\text{C-NMR}$  (62.5 MHz,  $\text{CDCl}_3$ ):  $\delta$  87.3, 93.4, 113.5, 115.1, 115.4, 118.6, 127.3, 130.0, 133.1, 135.2, 138.9, 157.5, 159.9, 166.6

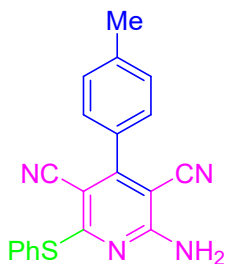

**2-Amino-4-(4-methylphenyl)-6-(phenylthio)pyridine-3,5-dicarbonitrile (4e)**

Pale yellow solid, IR (KBr):  $\nu$  3474, 3336, 2214, 1625, 1438, 1261, 1023, 809, 755  $\text{cm}^{-1}$ .  $^1\text{H-NMR}$  (250 MHz,  $\text{DMSO-}d_6$ ):  $\delta$  2.42 (s, 3H, Me), 5.54 (s, 2H,  $\text{NH}_2$ ), 7.25 (m, 2H, Ar-H), 7.32-7.35 (m, 7H, Ar-H).  $^{13}\text{C-NMR}$  (62.5 MHz,  $\text{DMSO-}d_6$ ):  $\delta$  18.3, 21.4, 58.3, 87.3, 114.9, 115.3, 127.2, 128.4, 129.3, 129.7, 130.2, 135.7, 141.4, 158.5, 159.3, 160.9

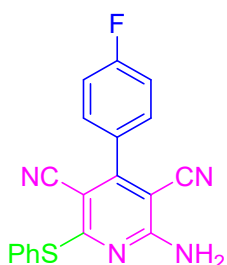

**2-Amino-4-(4-fluorophenyl)-6-(phenylthio)pyridine-3,5-dicarbonitrile (4f)**

Cream solid, IR (KBr):  $\nu$  3493, 3411, 2918, 3223, 2216, 1633, 1441, 1231, 1021, 826, 758  $\text{cm}^{-1}$ .  $^1\text{H-NMR}$  (62.5 MHz,  $\text{CDCl}_3$ ):  $\delta$  7.30-7.79 (m, 9H, Ar-H), 5.59 (s, 2H,  $\text{NH}_2$ ).  $^{13}\text{C NMR}$  (62.5 MHz,  $\text{CDCl}_3$ ):  $\delta$  87.7, 93.9, 115.4, 115.7, 116.1, 119.4, 129.9, 130.1, 130.7, 131.4, 131.6, 158.1, 160.0, 161.9, 166.5.

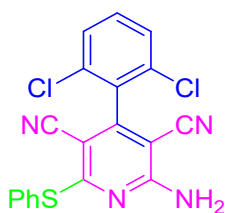

**2-Amino-4-(2,6-dichlorophenyl)-6-(phenylthio)pyridine-3,5-dicarbonitrile (4j)**

Pale green solid, IR (KBr):  $\nu$  3462, 3357, 3075, 2872, 2208, 2176, 1659, 1250, 1023, 722, 688  $\text{cm}^{-1}$ .  $^1\text{H-NMR}$  (250 MHz,  $\text{CDCl}_3$ ):  $\delta$  7.31-7.51 (m, 8H, Ar-H), 5.91 (s, 2H,  $\text{NH}_2$ ).  $^{13}\text{C NMR}$  (62.5 MHz,  $\text{CDCl}_3$ ):  $\delta$  87.3, 93.4, 111.7, 114.9, 118.3, 119.1, 120.0, 126.3, 126.6, 131.4, 135.1, 151.2, 159.4, 159.7, 170.0

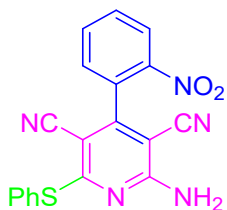

**2-Amino-4-(2-nitrophenyl)-6-(phenylthio)pyridine-3,5-dicarbonitrile (4l)**

Pale yellow solid, IR (KBr):  $\nu$  3464, 3407, 3127, 2216, 1623, 1439, 1345, 1256, 1127, 1109, 855, 747  $\text{cm}^{-1}$ .  $^1\text{H-NMR}$  (250 MHz,  $\text{DMSO-}d_6$ ):  $\delta$  8.34 (d, 2H,  $J = 7.75$ , Ar-H), 7.42-7.99 (m, 10H, Ar-H,  $\text{NH}_2$ ).  $^{13}\text{C NMR}$  (62.5 MHz,  $\text{CDCl}_3$ ):  $\delta$  86.3, 93.8, 114.3, 114.8, 121.1, 127.7, 129.1, 129.5, 130.5, 131.1, 136.1, 143.8, 146.1, 149.2, 157.4, 160.5, 161.6.

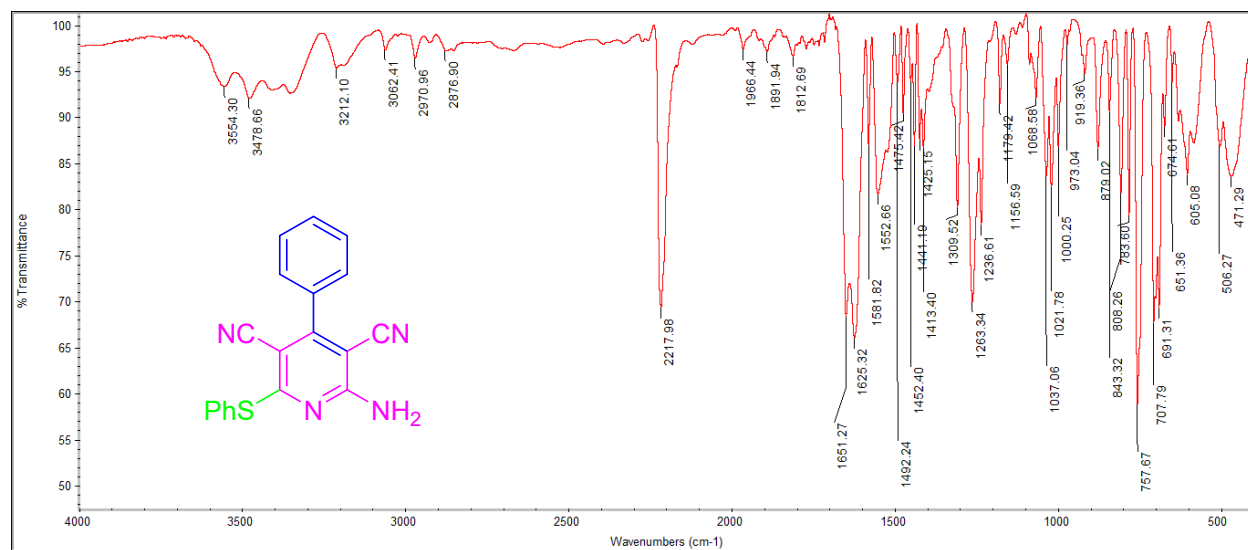

**Figure S1.** FT-IR spectrum of 2-amino-4-phenyl-6-(phenylthio)pyridine-3,5-dicarbonitrile (**4a**)

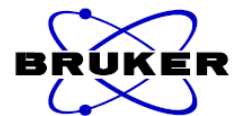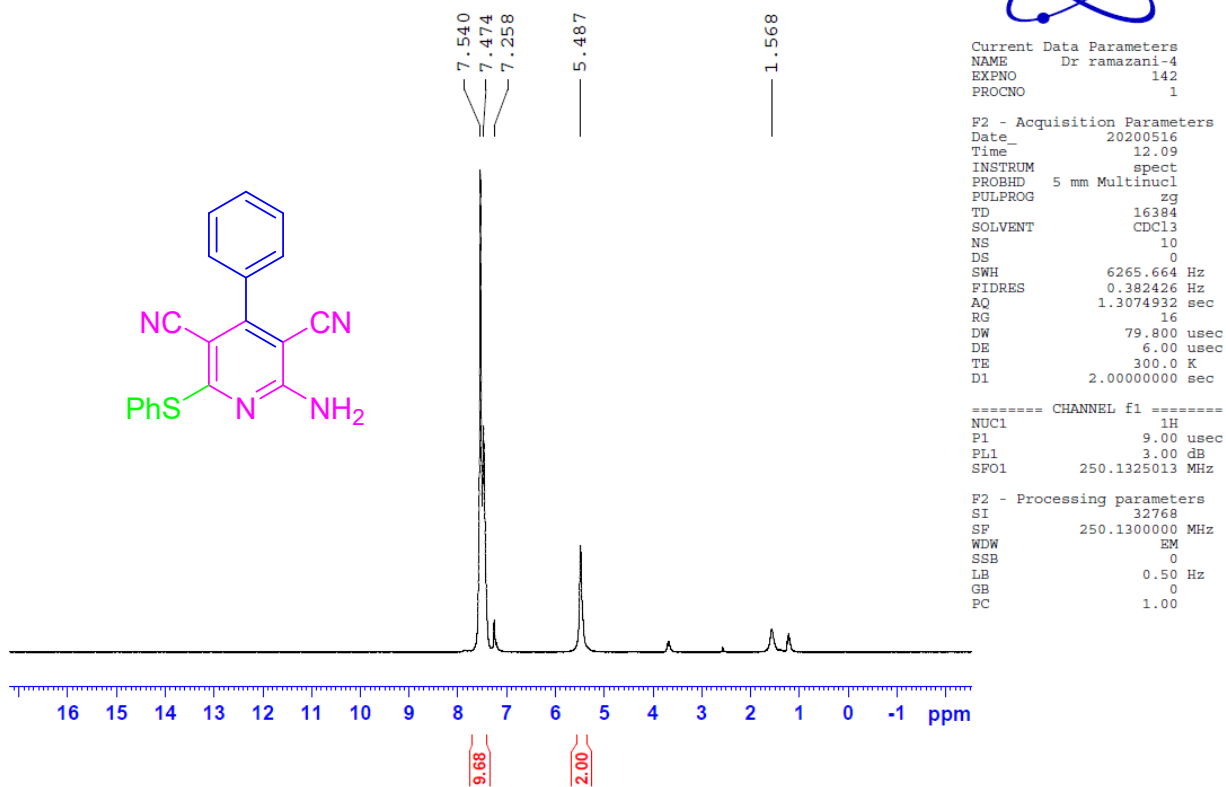

**Figure S2.**  $^1\text{H}$  NMR spectrum of 2-amino-4-phenyl-6-(phenylthio)pyridine-3,5-dicarbonitrile (4a)



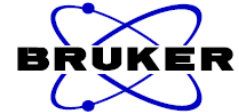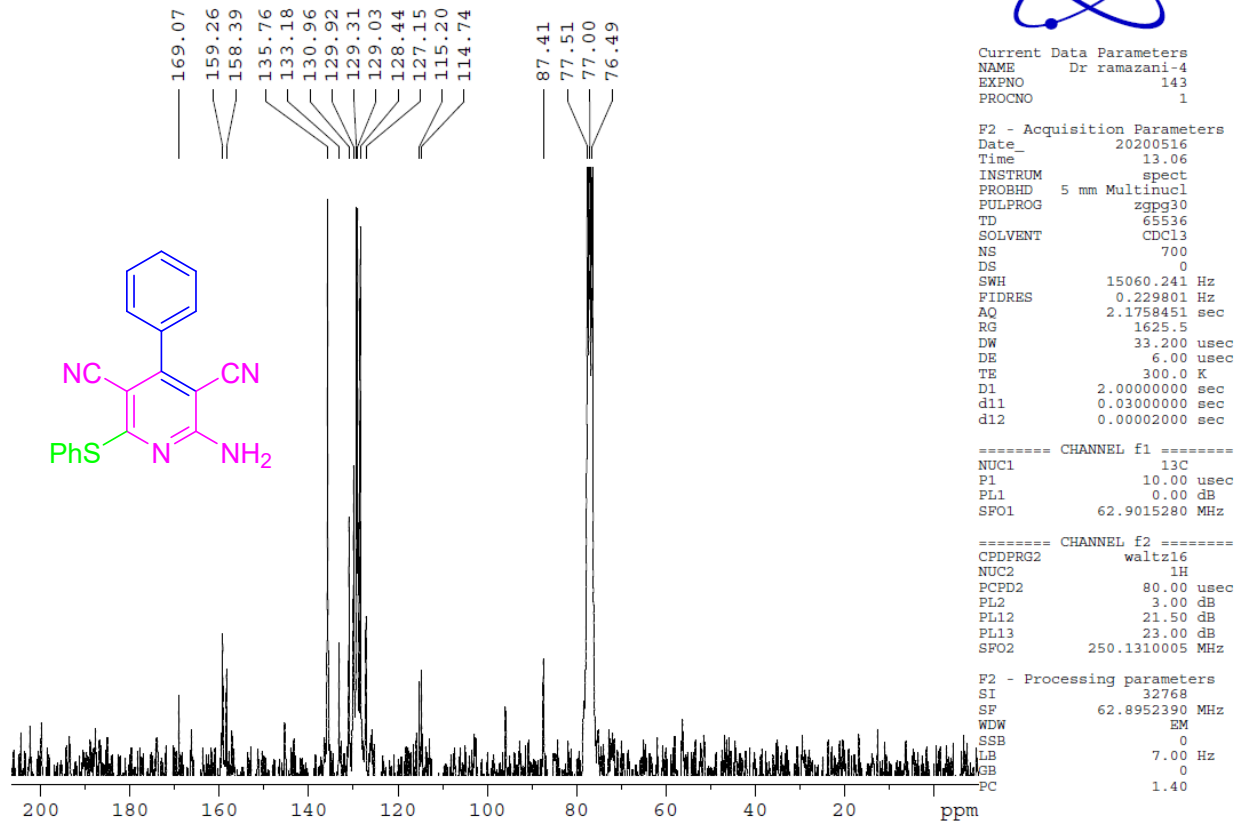

**Figure S3.** <sup>13</sup>C NMR spectrum of 2-amino-4-phenyl-6-(phenylthio)pyridine-3,5-dicarbonitrile (4a)

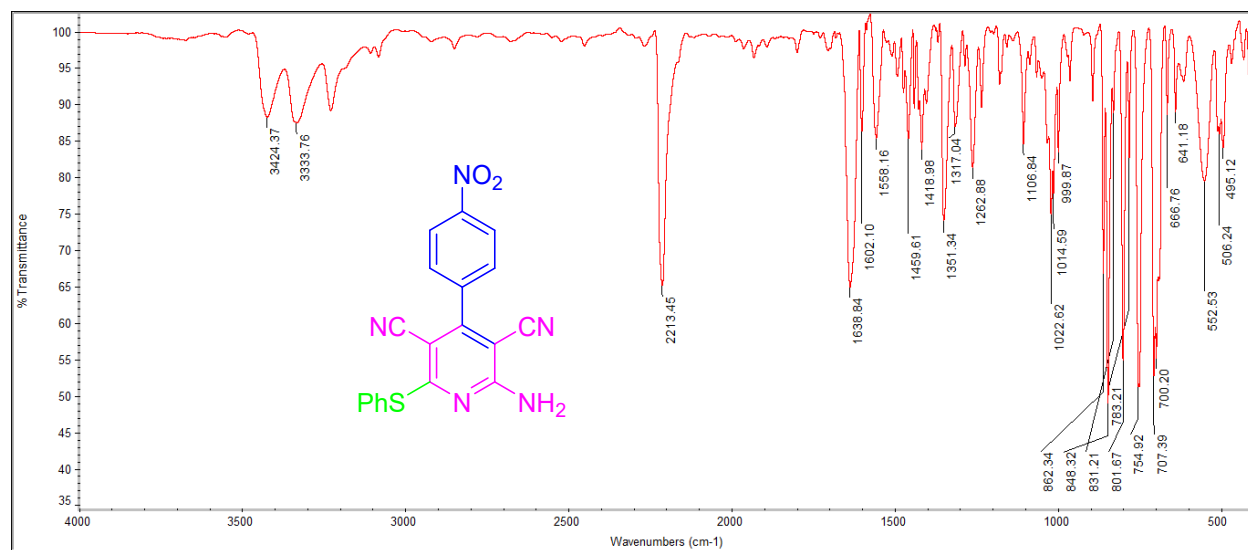

**Figure S4.** FT-IR spectrum of 2-amino-4-(4-nitrophenyl)-6-(phenylthio)pyridine-3,5-dicarbonitrile (**4b**)

Sobhan\*-Rezayati-S3-1400-2-27

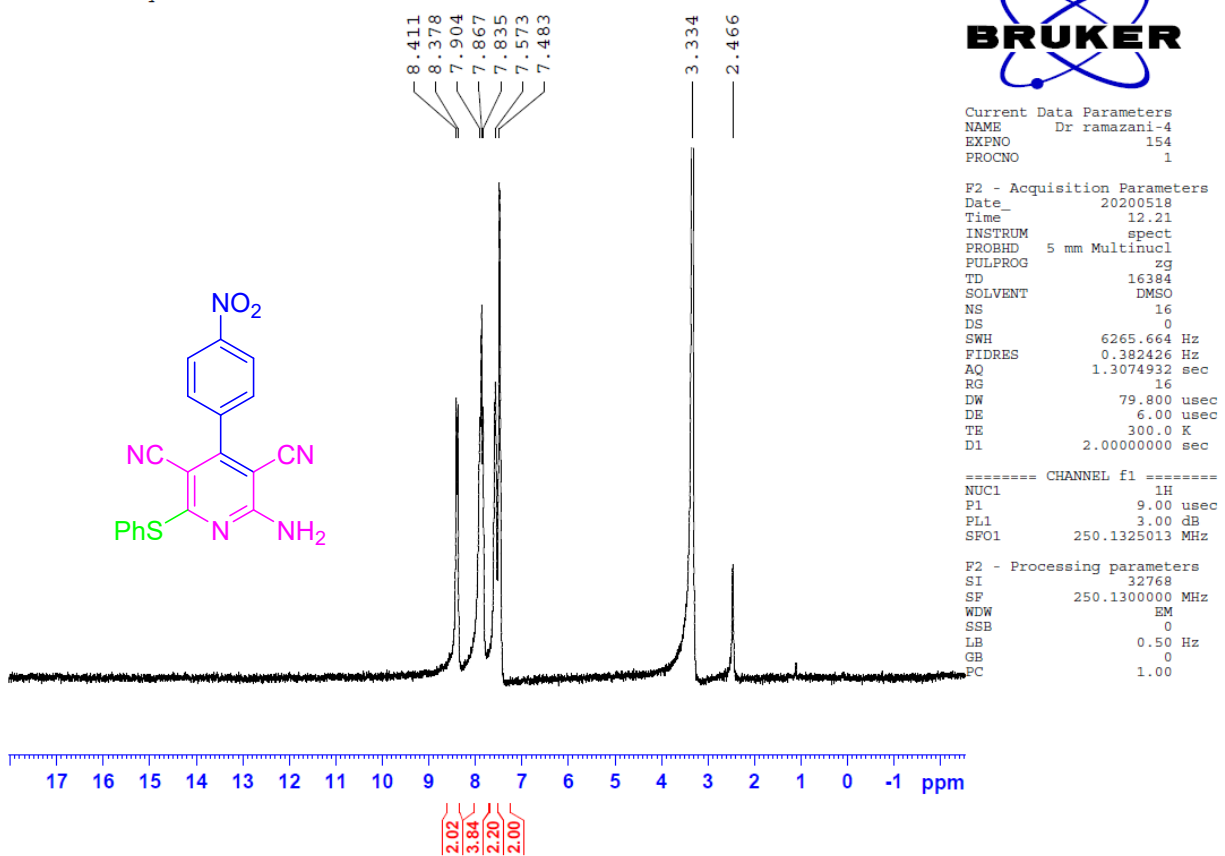

**Figure S5.** <sup>1</sup>H NMR spectrum of 2-amino-4-(4-nitrophenyl)-6-(phenylthio)pyridine-3,5-dicarbonitrile (**4b**)

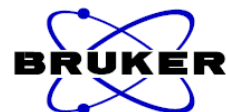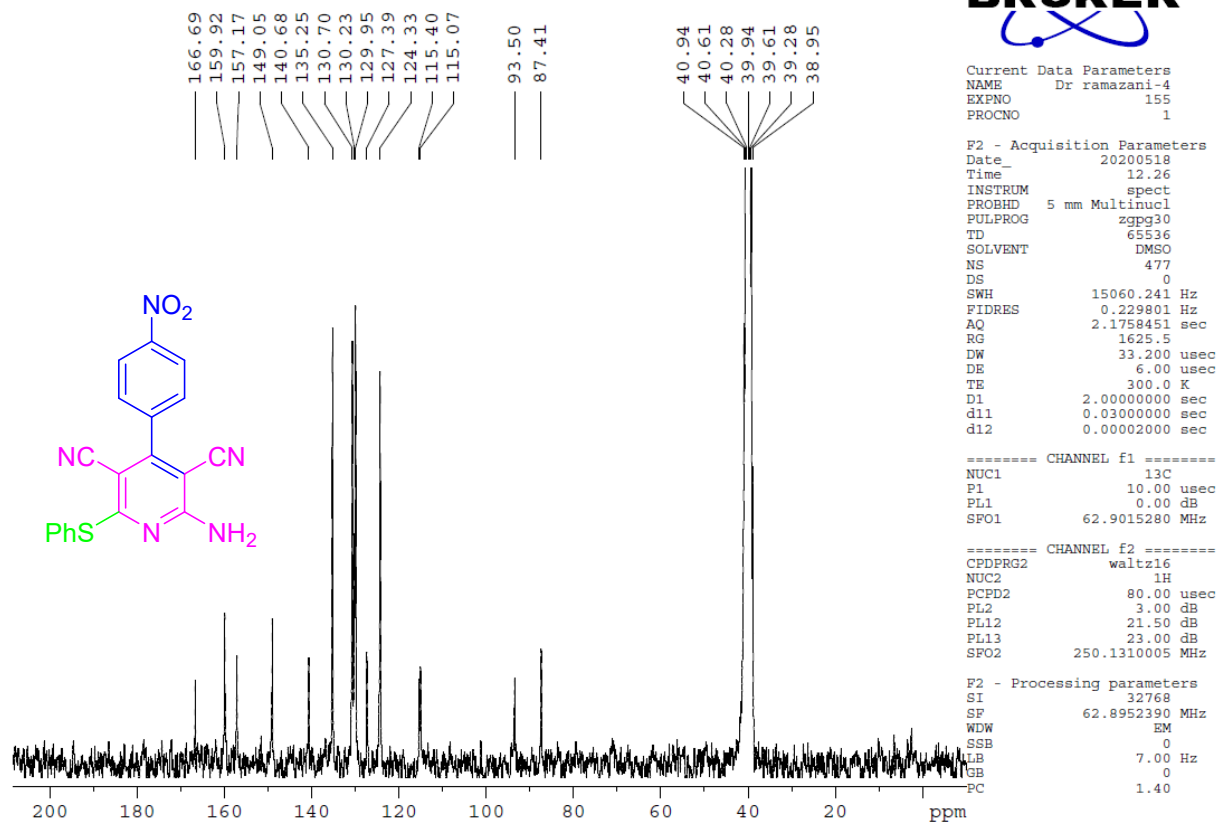

**Figure S6.**  $^{13}\text{C}$  NMR spectrum of 2-amino-4-(4-nitrophenyl)-6-(phenylthio)pyridine-3,5-dicarbonitrile (**4b**)

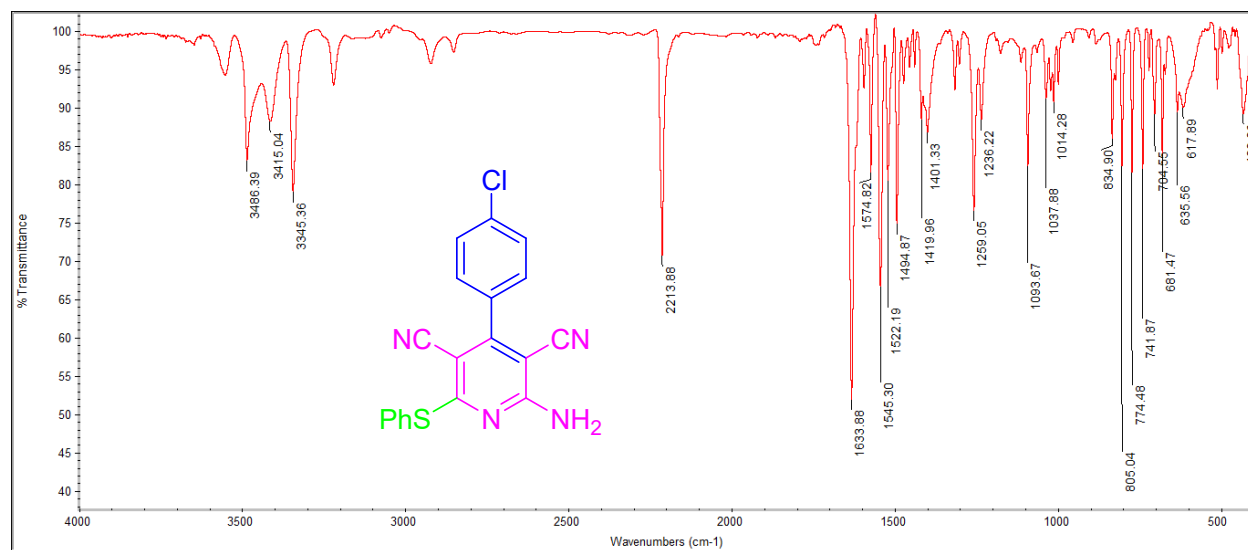

**Figure S7.** FT-IR spectrum of 2-amino-6-((4-chlorophenyl)thio)-4-henylpyridine-3,5-dicarbonitrile (**4c**)

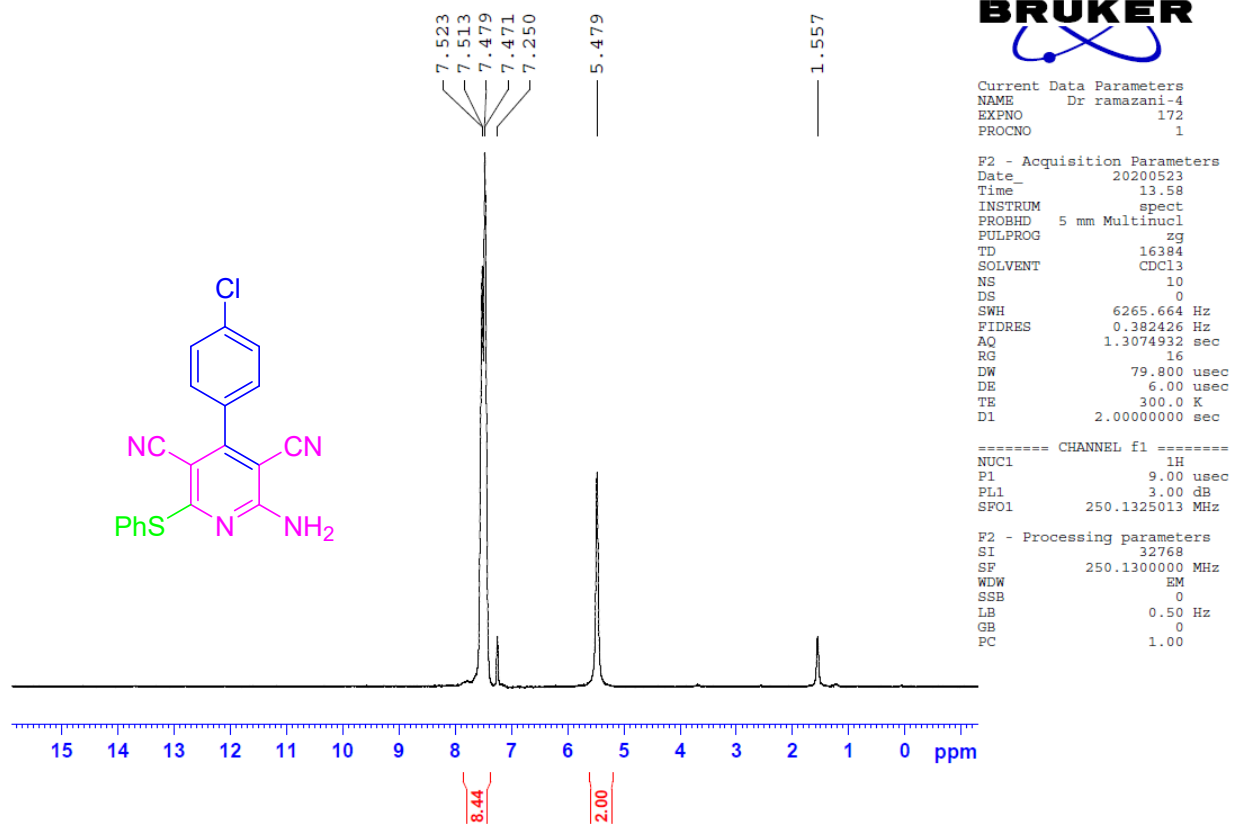

**Figure S8.**  $^1\text{H}$  NMR spectrum of 2-amino-6-((4-chlorophenyl)thio)-4-henylpyridine-3,5-dicarbonitrile (**4c**)

Sobhan-Rezayati-S4-1400-3-1

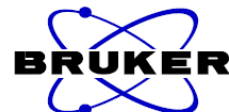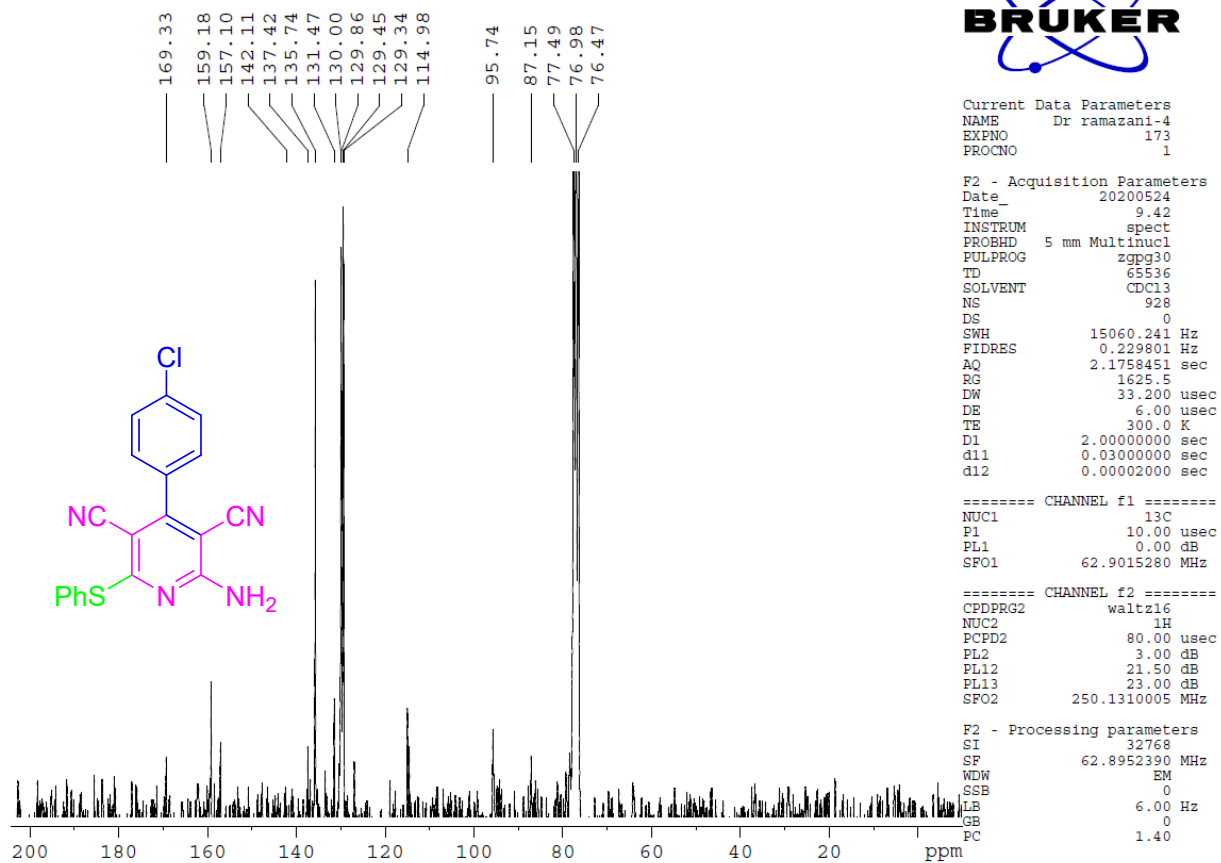

**Figure S9.**  $^{13}\text{C}$  NMR spectrum of 2-amino-6-((4-chlorophenyl)thio)-4-henylpyridine-3,5-dicarbonitrile (**4c**)

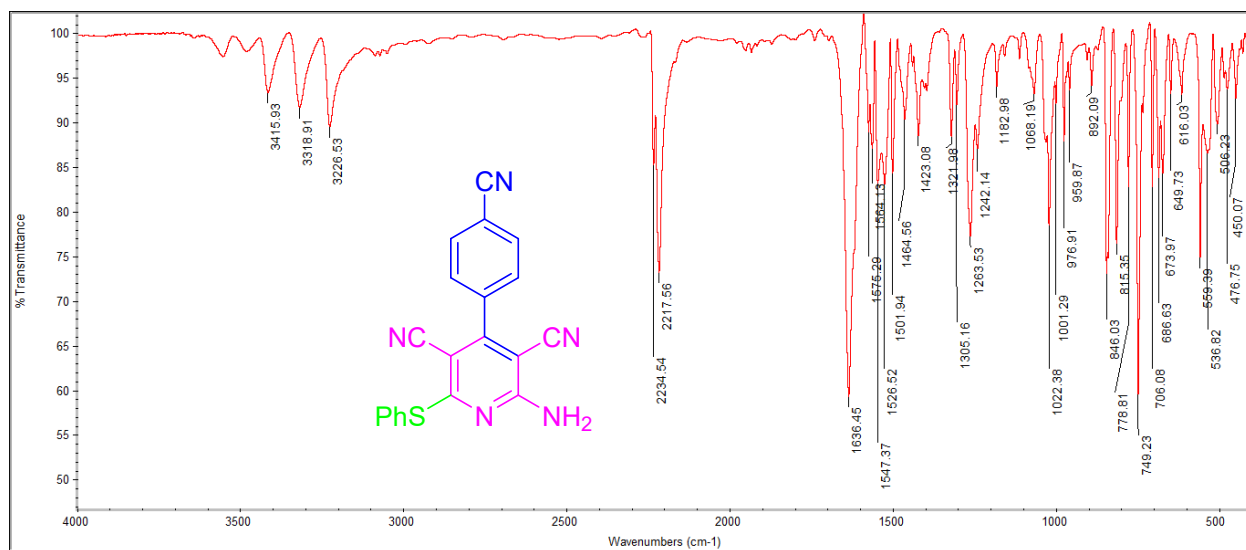

**Figure S10.** FT-IR spectrum of 2-amino-6-((4-cyanophenyl)thio)-4-henylpyridine-3,5-dicarbonitrile (**4d**)



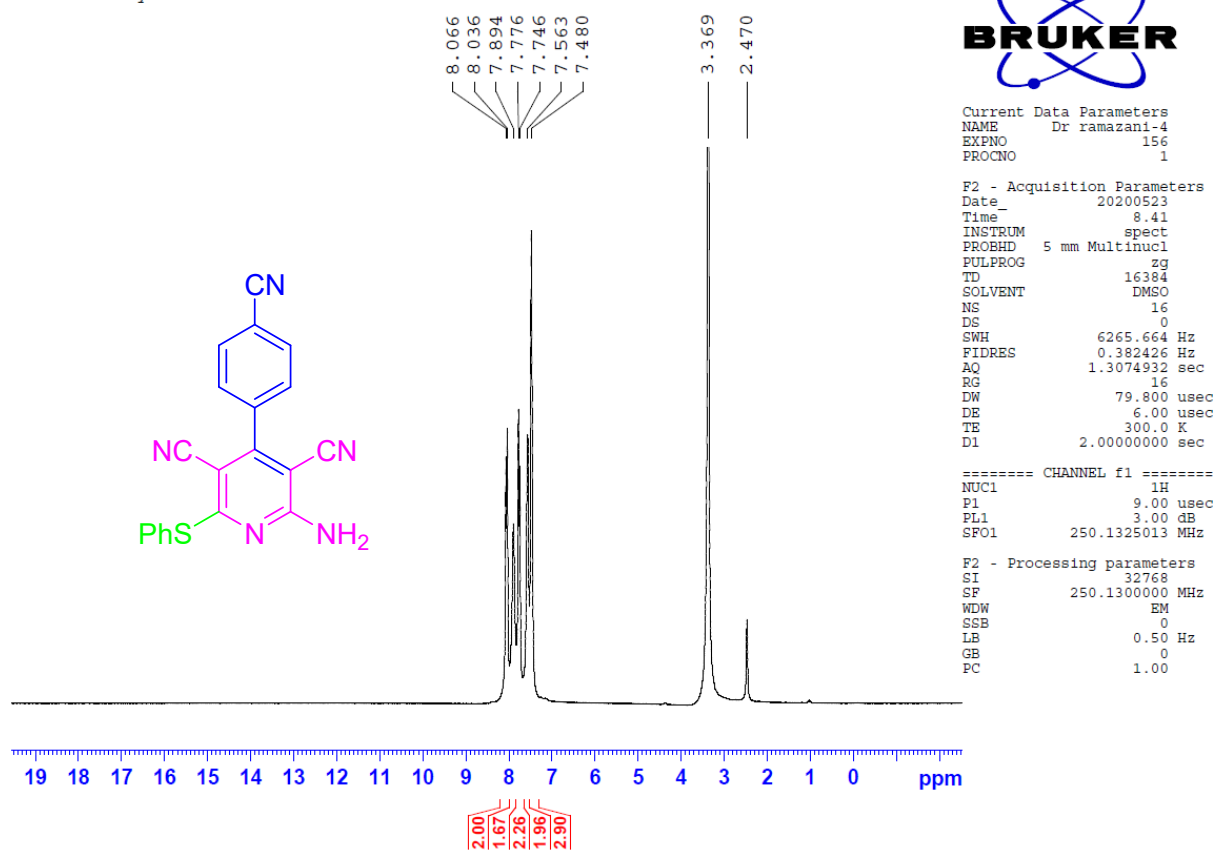

**Figure S11.**  $^1\text{H}$  NMR spectrum of 2-amino-6-((4-cyanophenyl)thio)-4-henylpyridine-3,5-dicarbonitrile (**4d**)

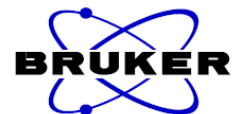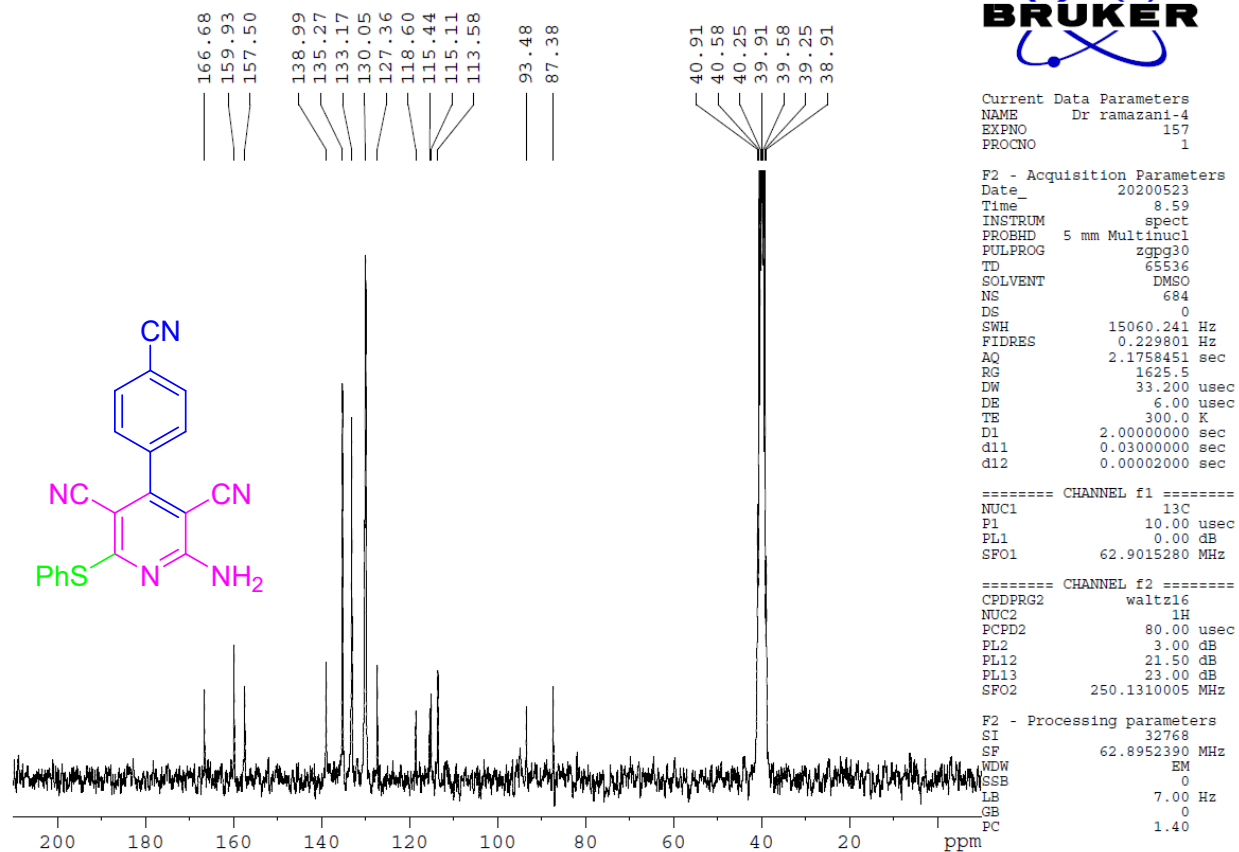

**Figure S12.**  $^{13}\text{C}$  NMR spectrum of 2-amino-6-((4-cyanophenyl)thio)-4-henylpyridine-3,5-dicarbonitrile (**4d**)

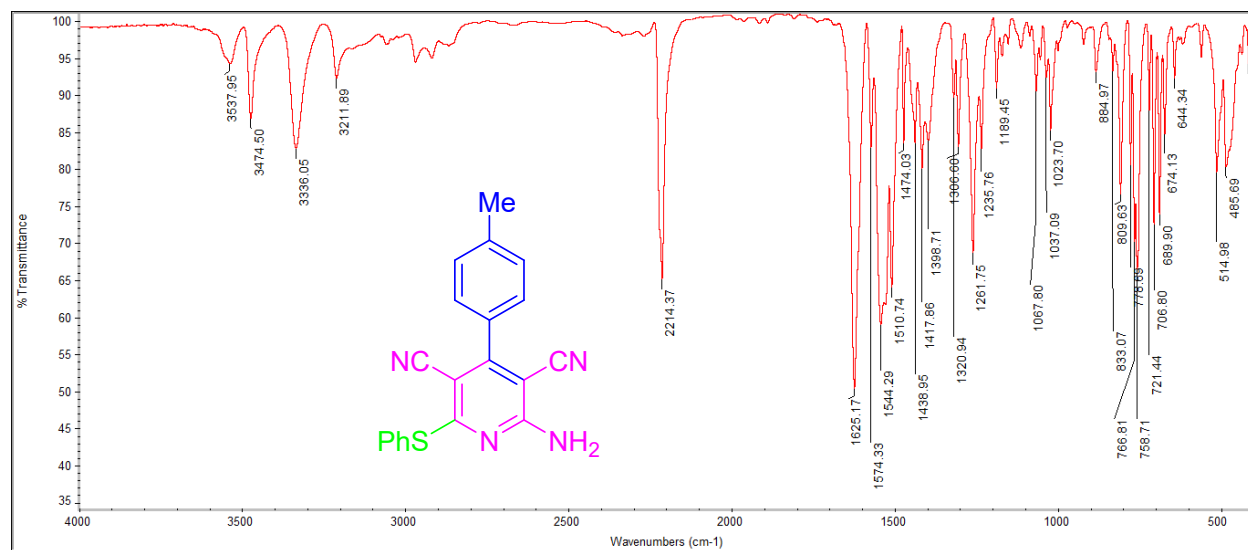

**Figure S13.** FT-IR spectrum of 2-amino-6-((4-methylphenyl)thio)-4-henylpyridine-3,5-dicarbonitrile (**4e**)

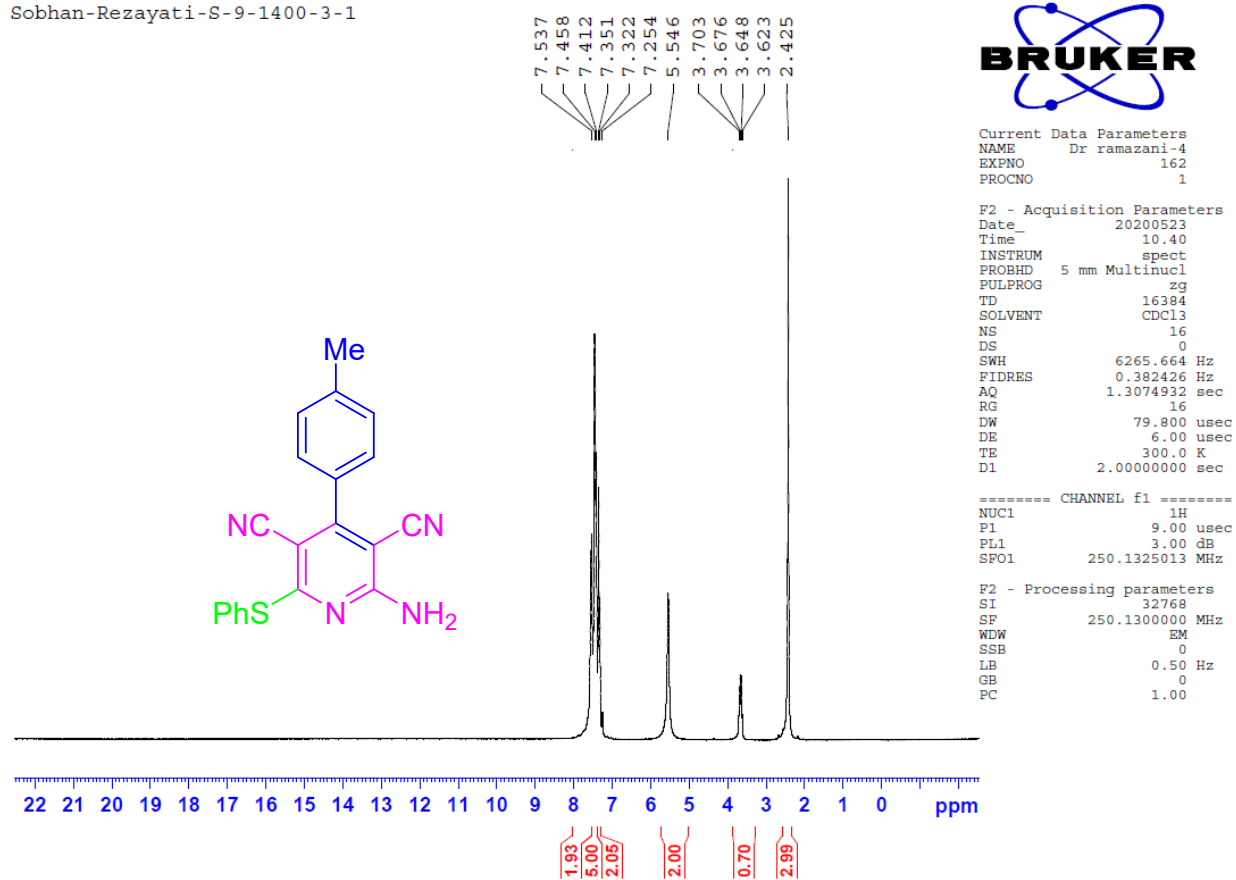

**Figure S14.** <sup>1</sup>H NMR spectrum of 2-amino-6-((4-methylphenyl)thio)-4-henylpyridine-3,5-dicarbonitrile (**4e**)

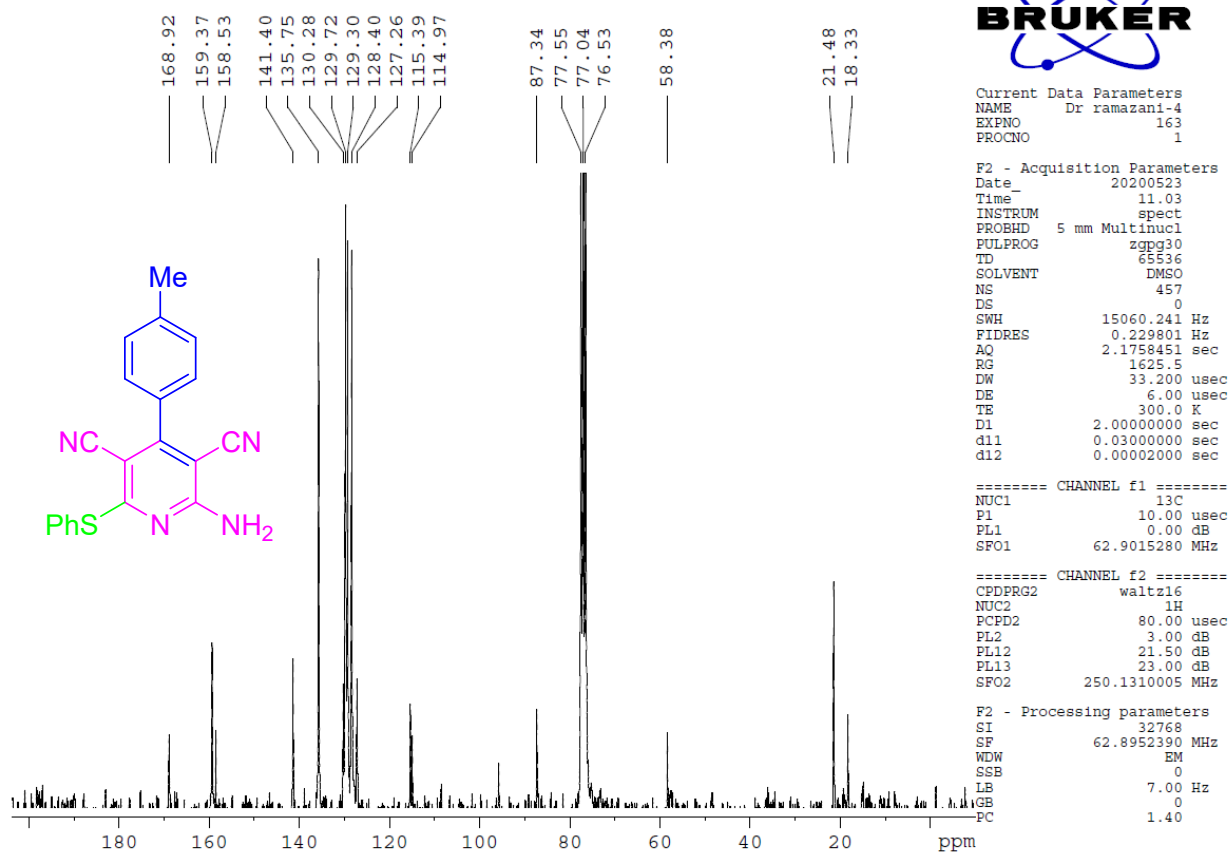

**Figure S15.**  $^{13}\text{C}$  NMR spectrum of 2-amino-6-((4-methylphenyl)thio)-4-henylpyridine-3,5-dicarbonitrile (**4e**)

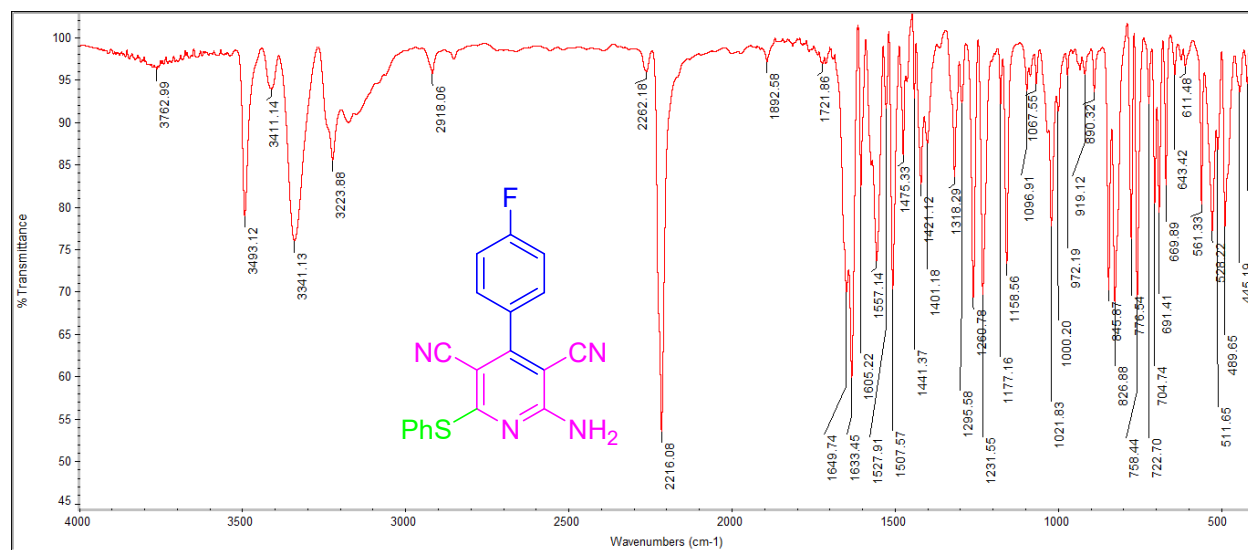

**Figure S16.** FT-IR spectrum of 2-amino-6-((4-fluorophenyl)thio)-4-henylpyridine-3,5-dicarbonitrile (**4f**)

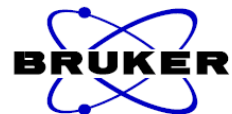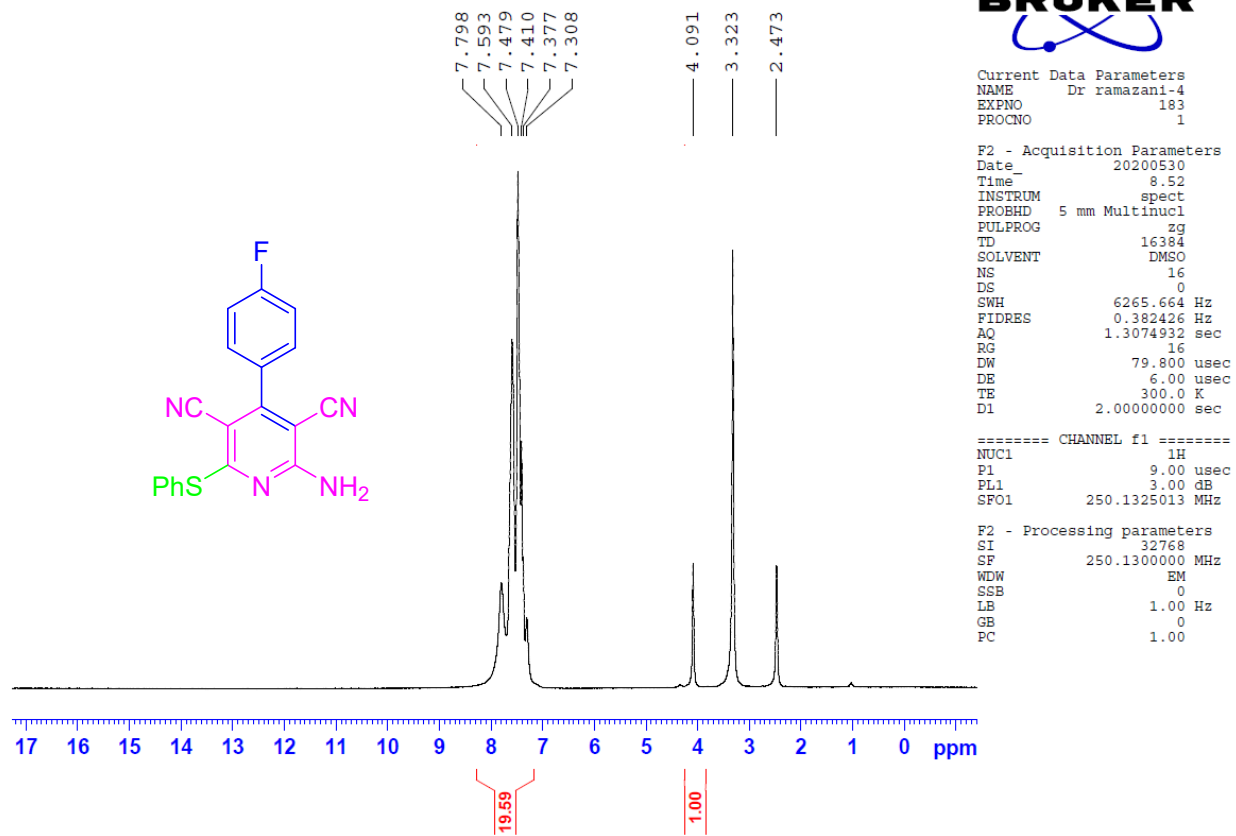

**Figure S17.**  $^1\text{H}$  NMR spectrum of 2-amino-6-((4-fluorophenyl)thio)-4-henylpyridine-3,5-dicarbonitrile (**4f**)

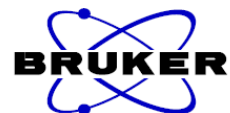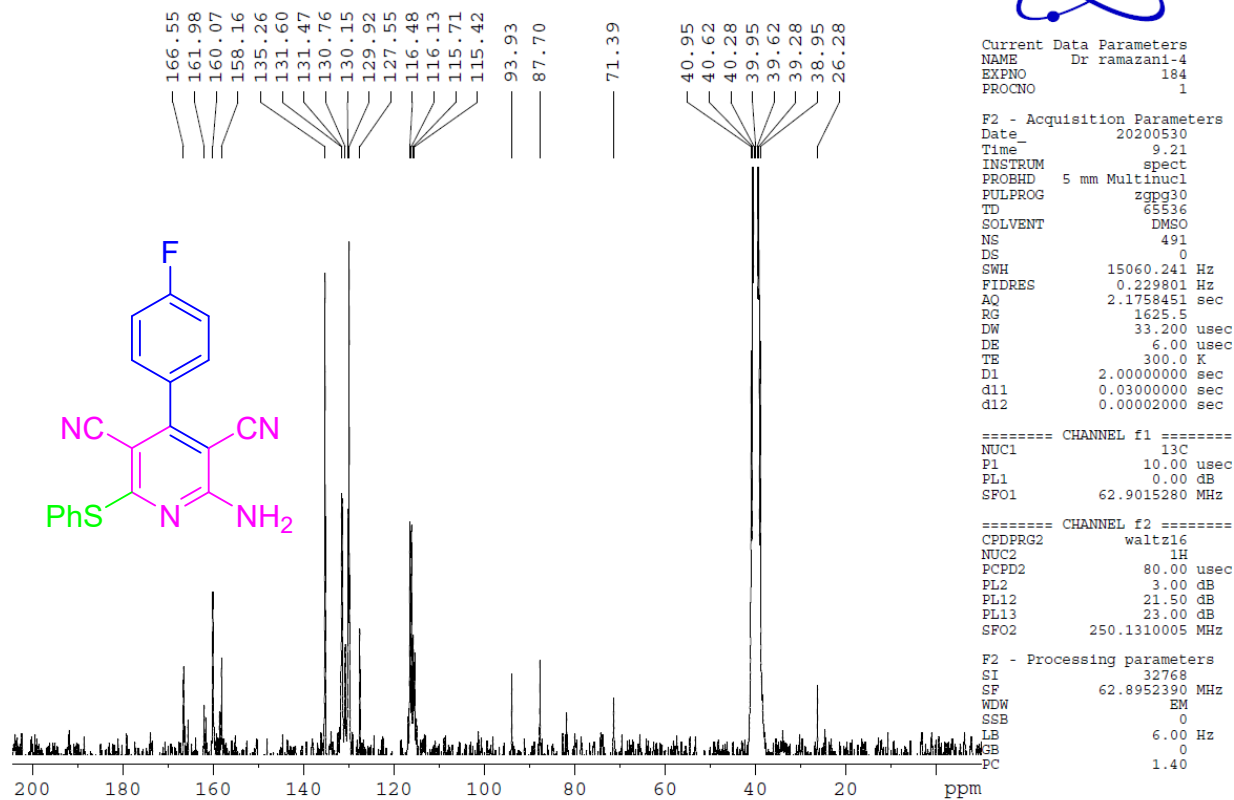

**Figure S18.** <sup>13</sup>C NMR spectrum of 2-amino-6-((4-fluorophenyl)thio)-4-henylpyridine-3,5-dicarbonitrile (**4f**)



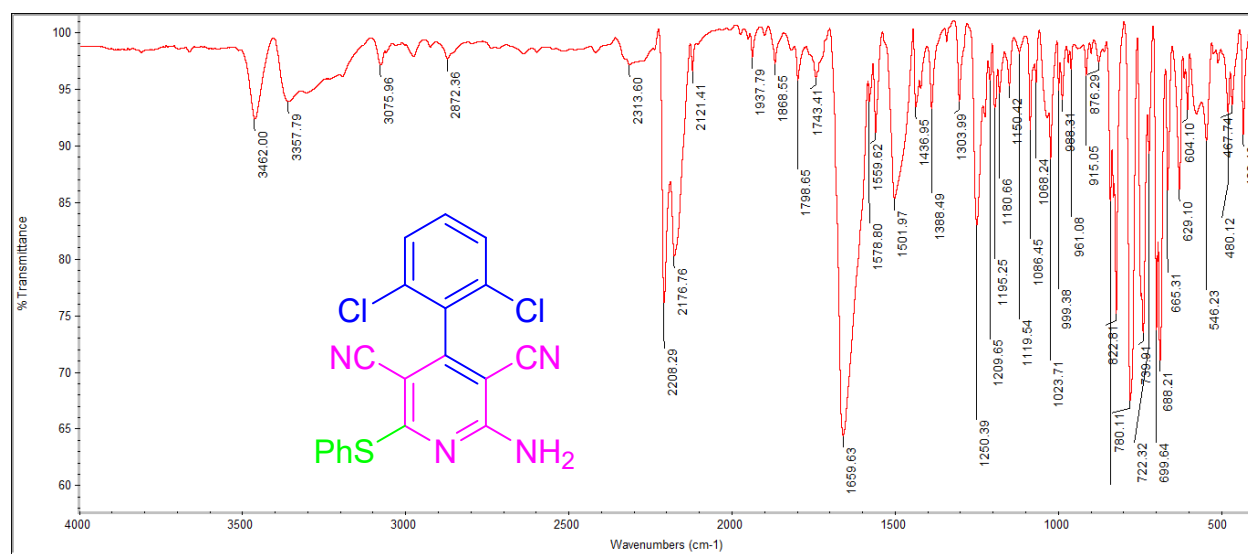

**Figure S19.** FT-IR spectrum of 2-amino-6-((2,6-dichlorophenyl)thio)-4-henylpyridine-3,5-dicarbonitrile (**4j**)

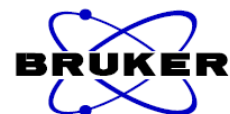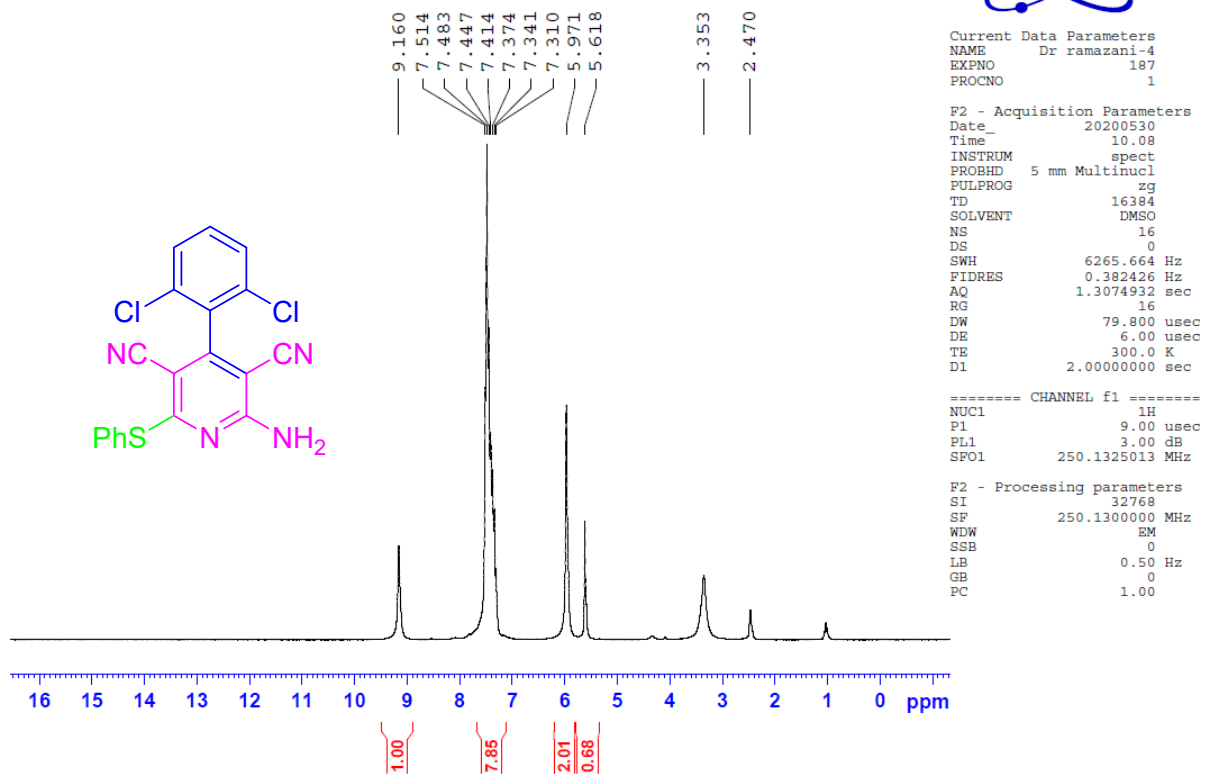

**Figure S20.**  $^1\text{H}$  NMR spectrum of 2-amino-6-((2,6-dichlorophenyl)thio)-4-henylpyridine-3,5-dicarbonitrile (**4j**)

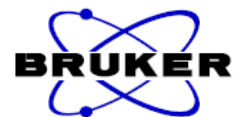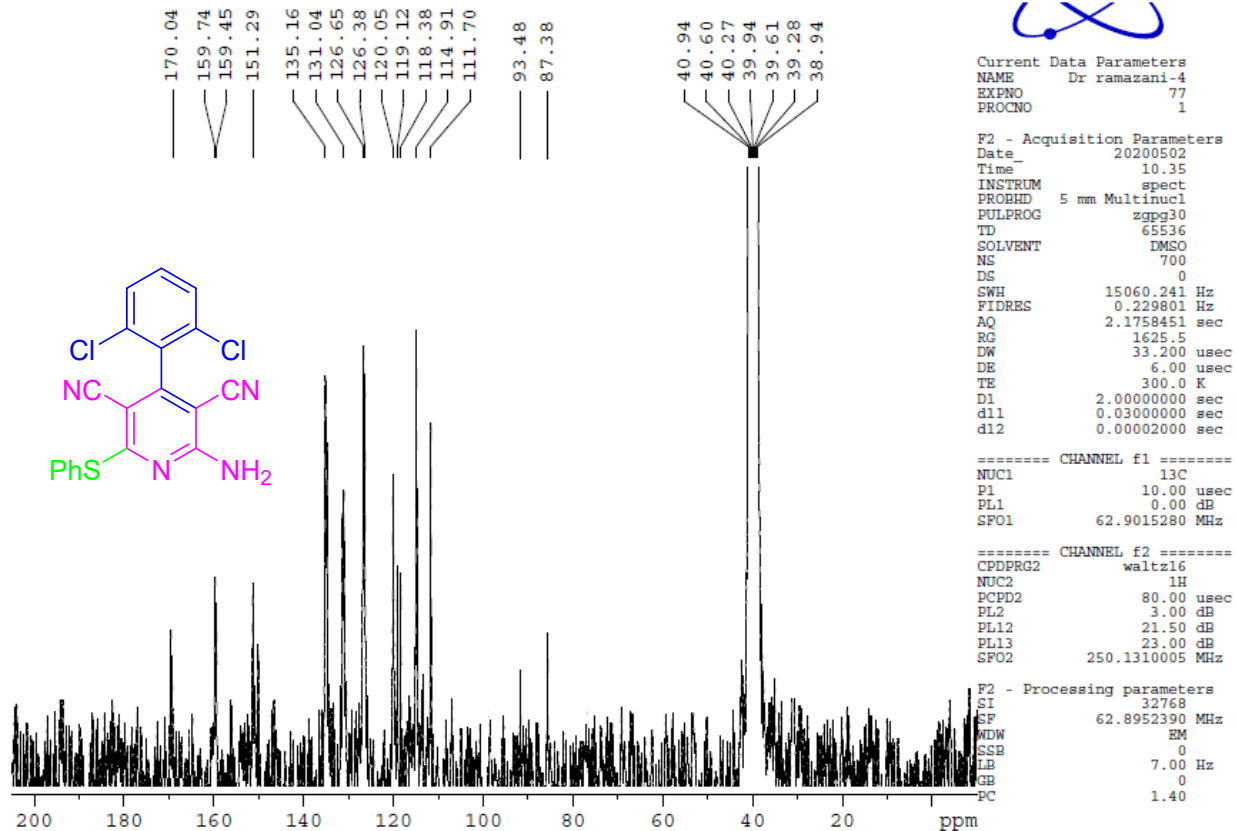

**Figure S21.** <sup>13</sup>C NMR spectrum of 2-amino-6-((2,6-dichlorophenyl)thio)-4-henylpyridine-3,5-dicarbonitrile (**4j**)

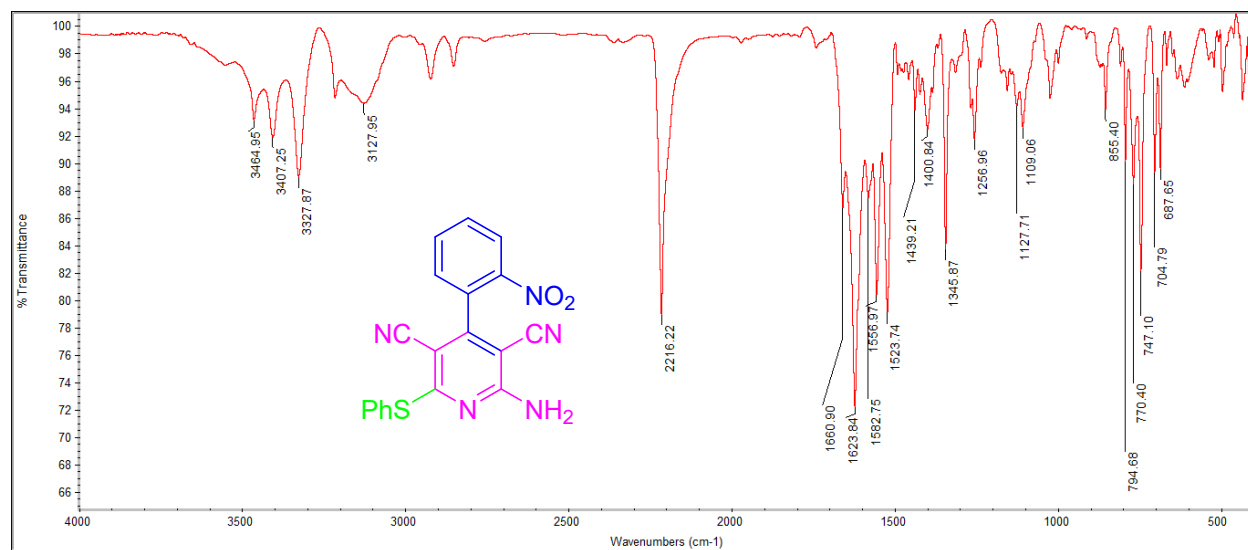

**Figure S22.** FT-IR spectrum of 2-amino-6-((2-nitrophenyl)thio)-4-henylpyridine-3,5-dicarbonitrile (**41**)

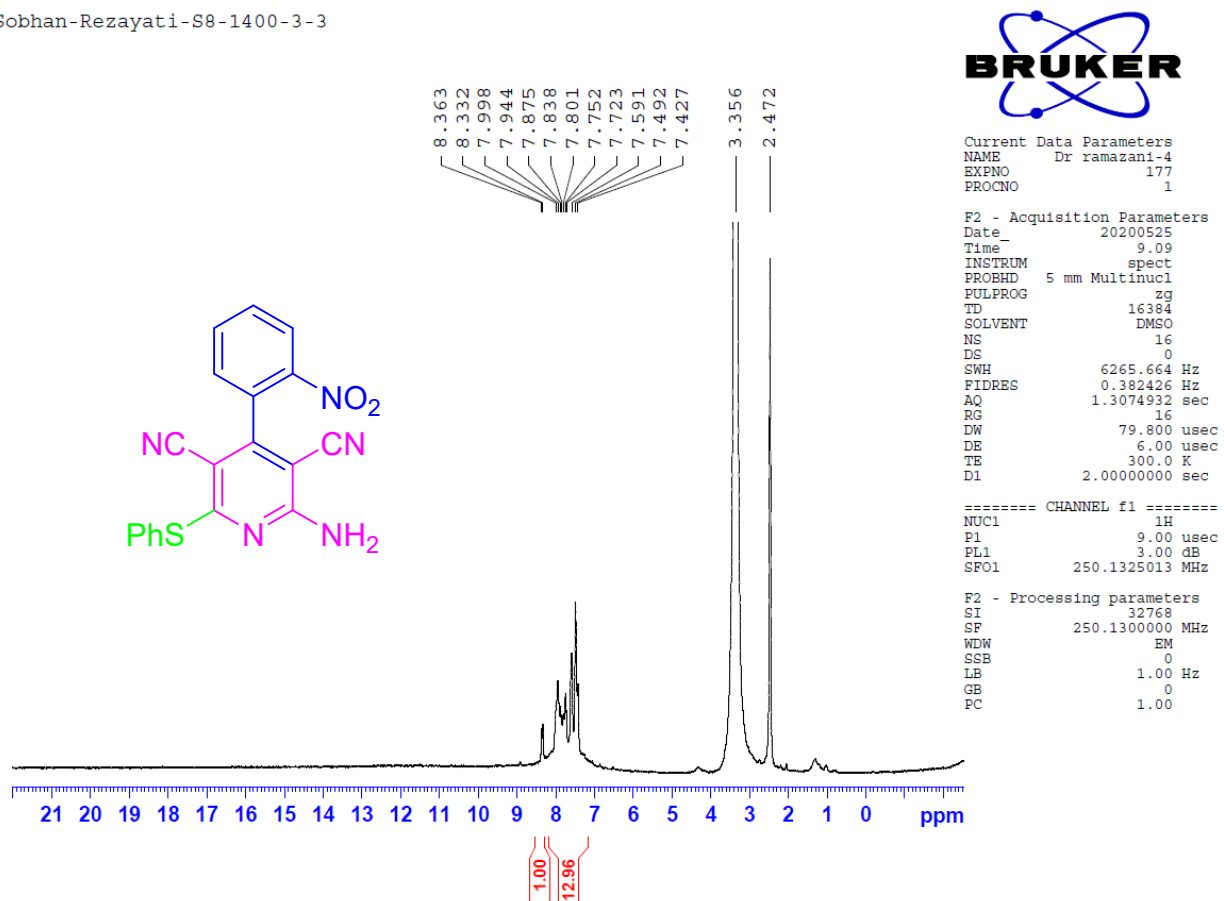

**Figure S23.**  $^1\text{H}$  NMR spectrum of 2-amino-6-((2-nitrophenyl)thio)-4-henylpyridine-3,5-dicarbonitrile (**4I**)

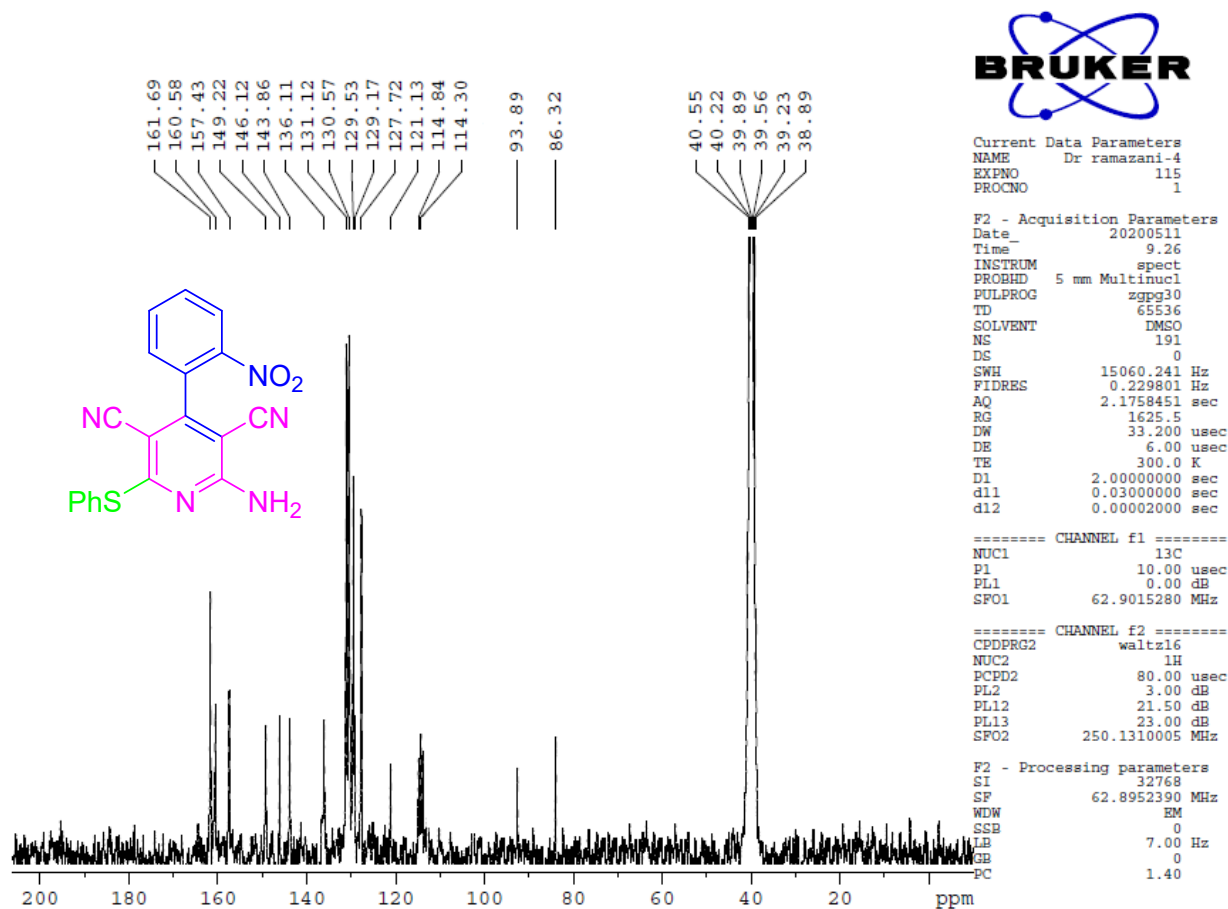

**Figure S24.**  $^{13}\text{C}$  NMR spectrum of 2-amino-6-((2-nitrophenyl)thio)-4-henylpyridine-3,5-dicarbonitrile (**4I**)
